# Supplementary material for: Palladium complexes of o-xylyl-linked alkoxybenzimidazolin-2-ylidenes: interesting structural conformations and application as pre-catalysts
Source: Royal Society of Chemistry journal article supplement (doi:10.1039/b908613g), 2009-01-01
Supplement: b908613g.pdf [file b908613g.pdf]

## Supporting Information

### Palladium complexes of *o*-xylyl-linked alkoxybenzimidazolin-2-ylidenes: interesting structural conformations and application as pre-catalysts

Murray V. Baker,<sup>\*a</sup> David H. Brown<sup>\*b</sup>, Peter V. Simpson,<sup>a</sup> Brian W. Skelton,<sup>a</sup> and Allan H. White<sup>a</sup>

<sup>a</sup>Chemistry M313, School of Biomedical, Biomolecular and Chemical Sciences, The University of Western Australia, 35 Stirling Highway, Crawley, WA 6009, Australia. Email: murray.baker@uwa.edu.au

<sup>b</sup>Nanochemistry Research Institute, Department of Applied Chemistry, Curtin University of Technology, Kent St, Bentley, WA 6102, Australia. Email: d.h.brown@curtin.edu.au

#### Table of Contents

|                                                                                |    |
|--------------------------------------------------------------------------------|----|
| Fig. S1: “Front on” projection of a single molecule of <b>3b</b>               | S2 |
| Fig. S2: “Front on” projection of a single molecule of <b>4a</b>               | S2 |
| Fig. S3: “Front on” projection of a single molecule of <i>cis</i> - <b>4b</b>  | S3 |
| Fig. S4: Selective 1D NOESY spectrum of <i>cis</i> - <b>4b</b> ( <i>syn</i> )  | S4 |
| Fig. S5: Selective 1D NOESY spectrum of <i>cis</i> - <b>4b</b> ( <i>syn</i> )  | S5 |
| Fig. S6: Selective 1D NOESY spectrum of <i>cis</i> - <b>4b</b> ( <i>anti</i> ) | S6 |
| Fig. S7: Selective 1D NOESY spectrum of <i>cis</i> - <b>4b</b> ( <i>anti</i> ) | S7 |

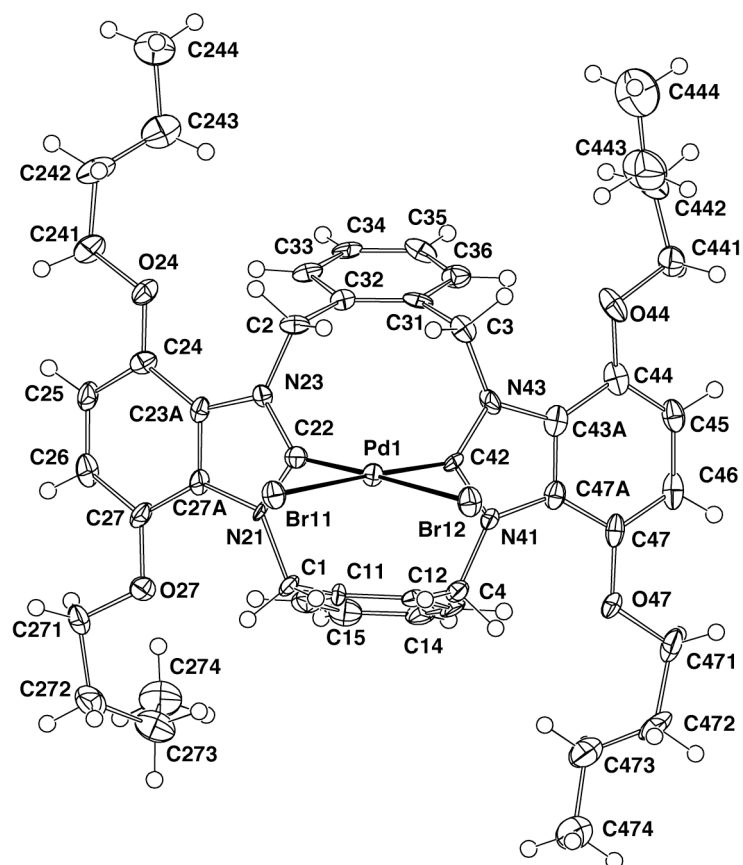

Figure S1. "Front on" projection of a single molecule of **3b**.

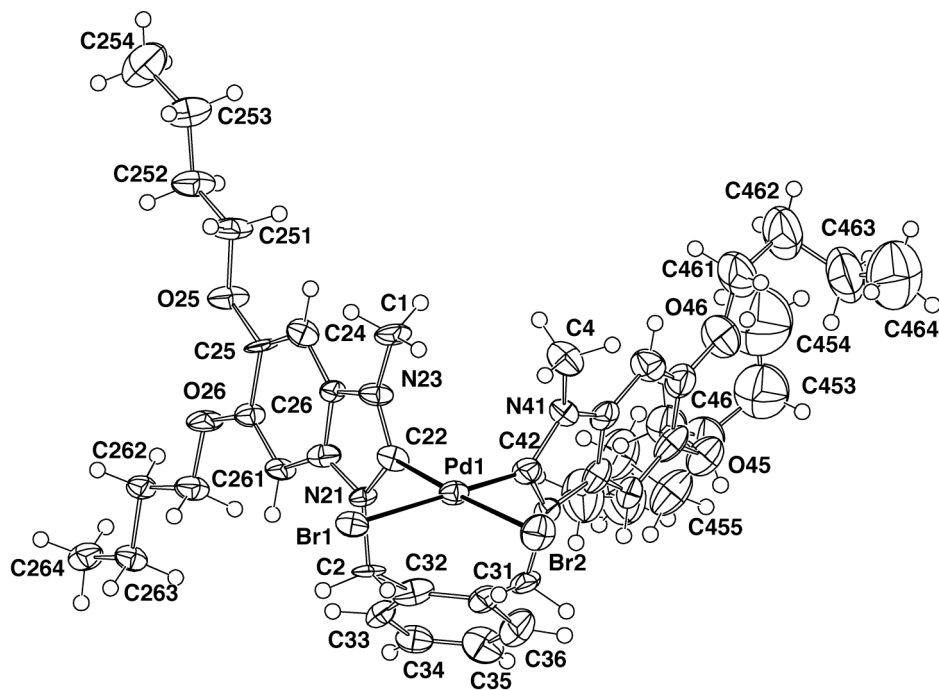

Figure S2. "Front on" projection of a single molecule of **4a**.

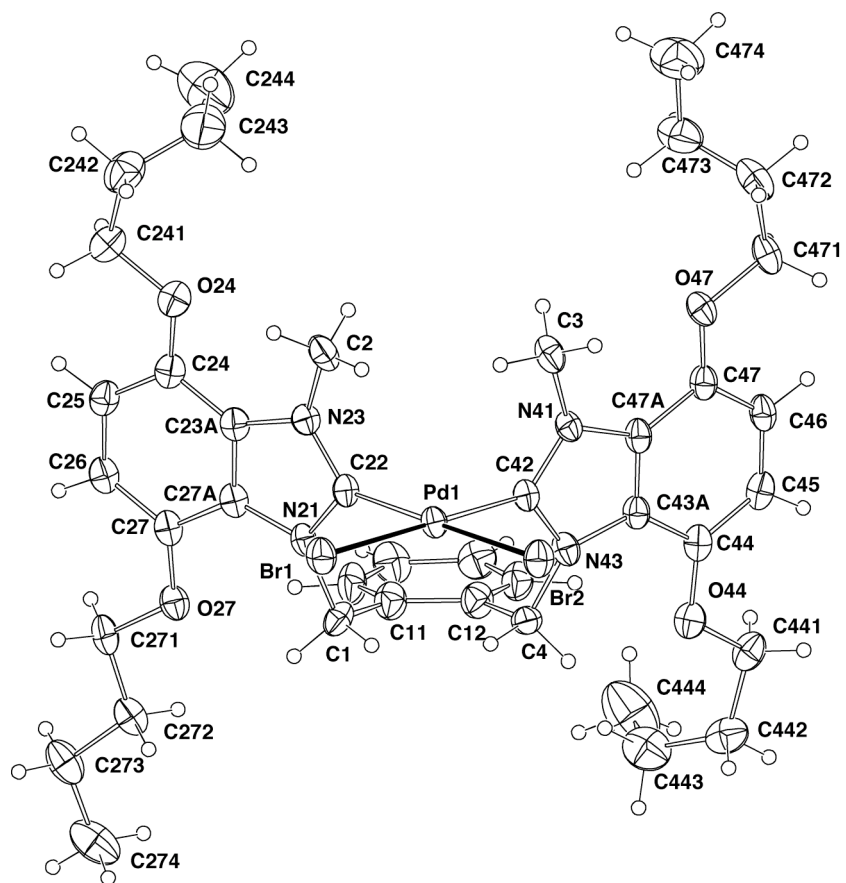

Figure S3. “Front on” projection of a single molecule of *cis-4b* (*anti*).

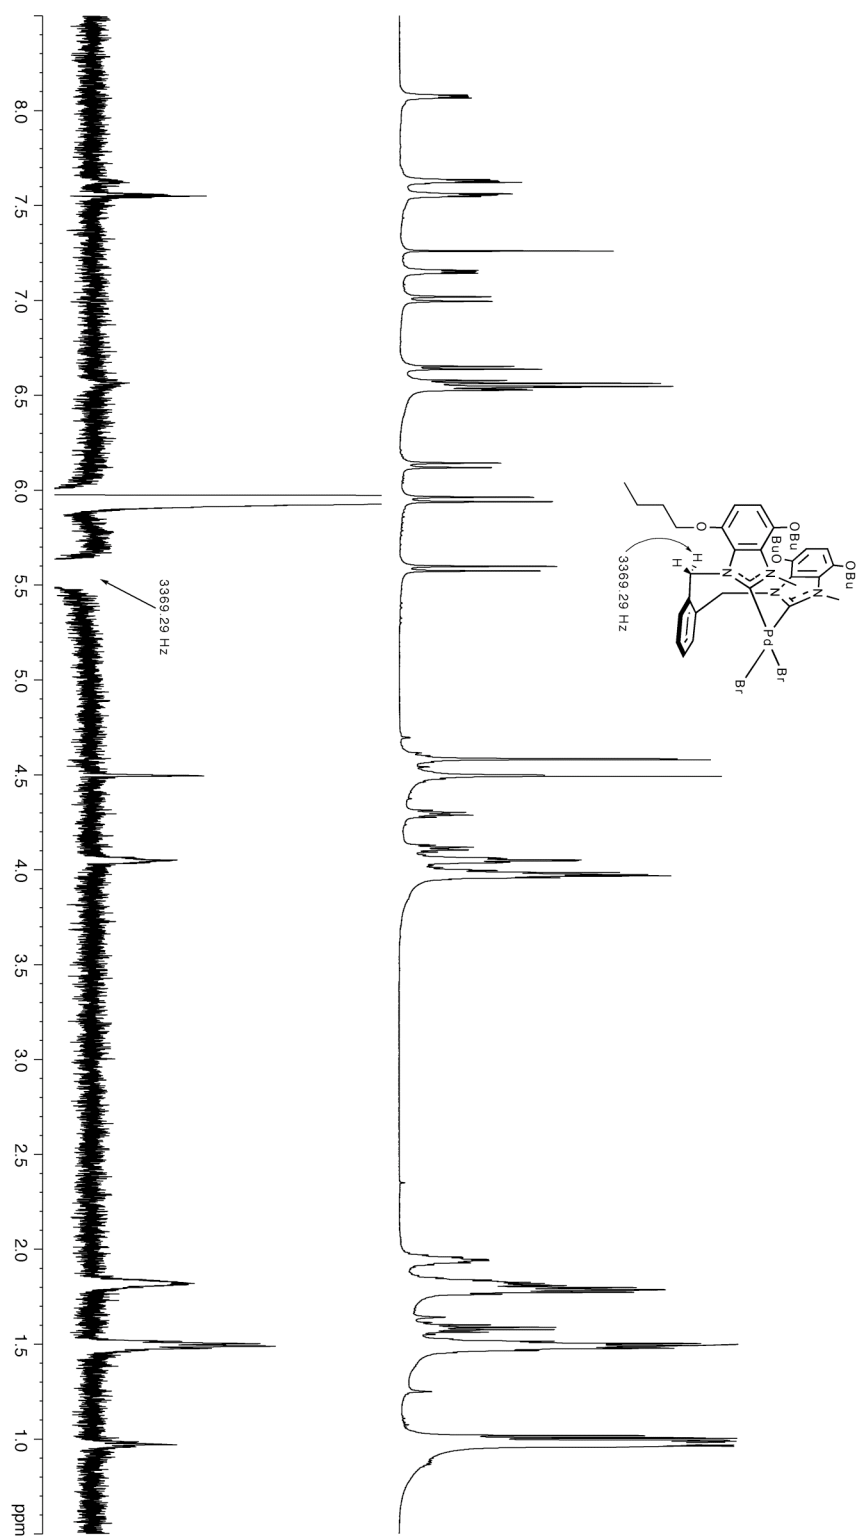

Fig. S4: Selective 1D NOESY (600.13 MHz) spectrum of *cis-4b* (*syn*).

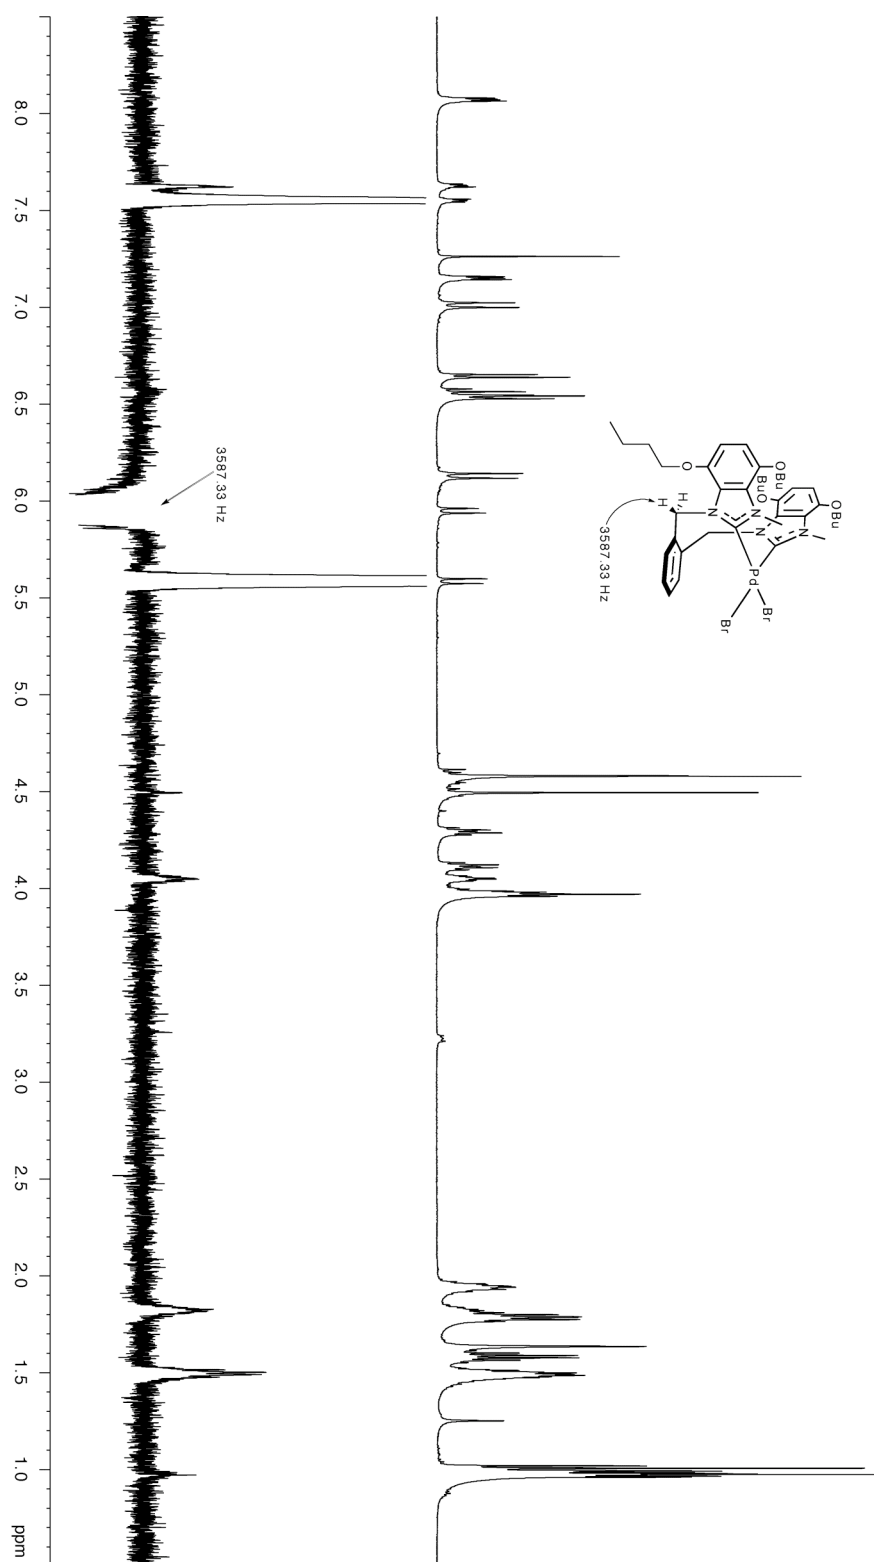

Fig. S5: Selective 1D NOESY spectrum (600.13 MHz) of *cis*-**4b** (*syn*). Note spectrum was recorded at a later date than other 1D NOESY experiments.

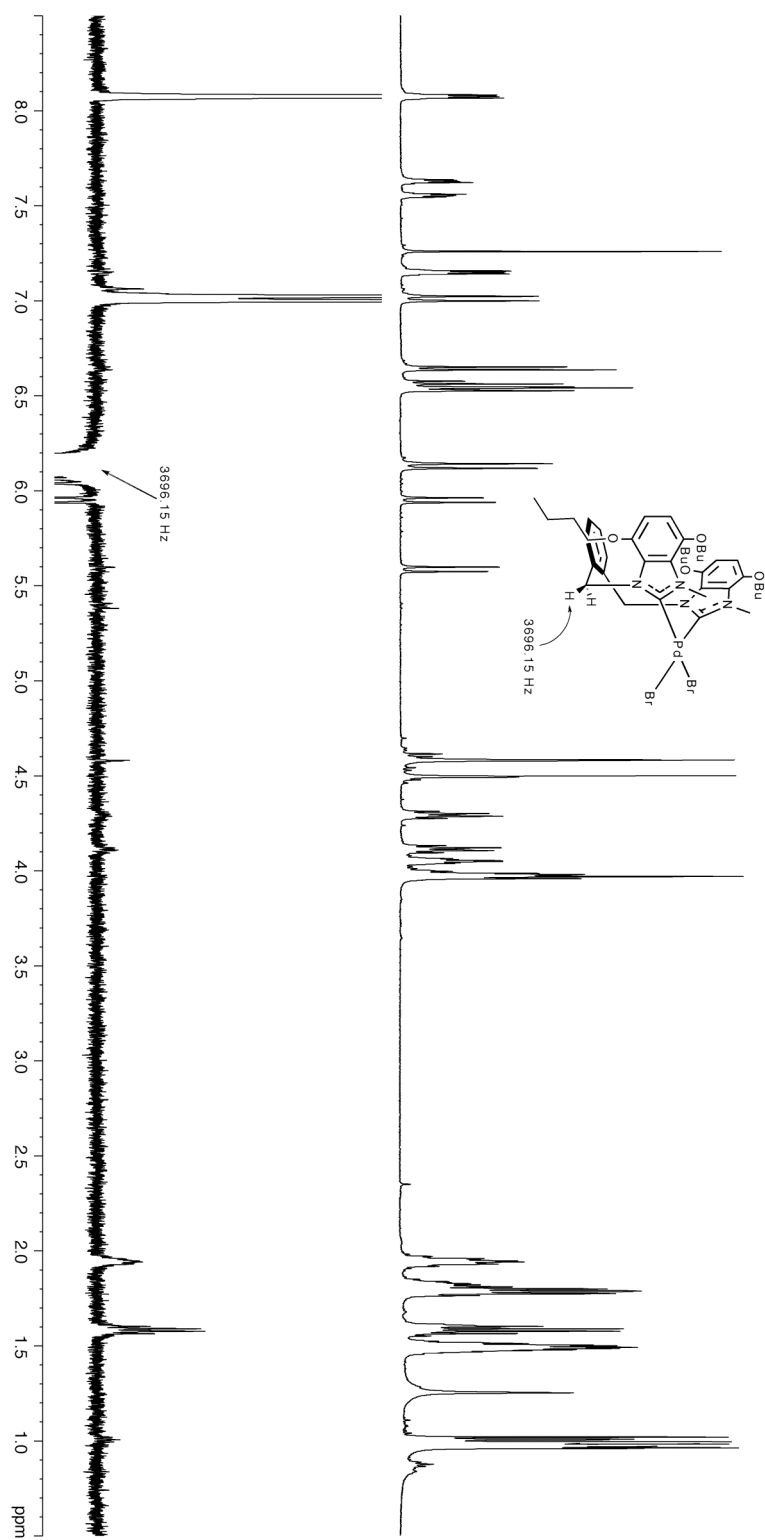

Fig. S6: Selective 1D NOESY spectrum (600.13 MHz) of *cis-4b* (*anti*).

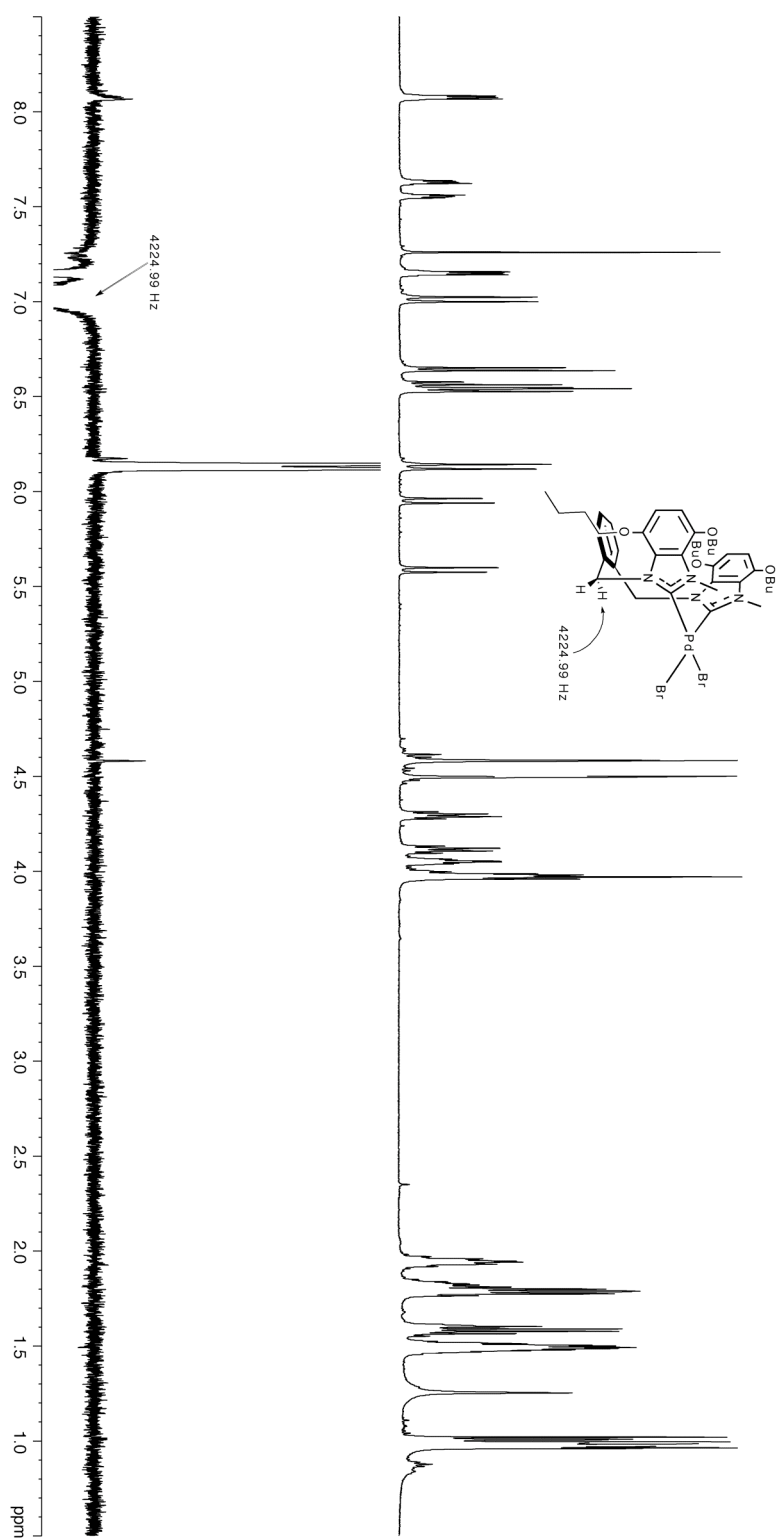

Fig. S7: Selective 1D NOESY spectrum (600.13 MHz) of *cis-4b* (*anti*).
